# Supplementary material for: Identifying Genetic Biomarkers Predicting Response to Anti-Vascular Endothelial Growth Factor Injections in Diabetic Macular Edema
Source: MDPI journal article supplement (doi:10.3390/ijms23074042), 2022-04-06
Supplement: s1 [file s1]

**Table S1.** Quality control steps in GenomeStudio (V 2.0) and PLINK (1.9/2.0) for individual array set.

**Figure S1:** Principal component analysis to detect ethnic outlier.

**Figure S2:** Scree plot showing the eigenvalues of the first 20 principal components.

**Figure S3:** Quantile-Quantile plot for association analysis; **A:** Change in central macular thickness; **B:** Change in best-corrected visual acuity.

**Figure S4:** Regional plots for genome-wide significant locus for change in central macular thickness.

**Figure S5:** Regional plots for genome-wide significant loci for change in best-corrected visual acuity.

**Figure S6A:** Manhattan plot for conditional analysis for change in central macular thickness conditioning upon the genome-wide significant lead SNPs.

**Figure S6B:** Quantile-Quantile plot for conditional analysis for change in central macular thickness conditioning upon the genome-wide significant lead SNPs.

**Figure S7A:** Manhattan plot for conditional analysis for change in best-corrected visual acuity conditioning upon the genome-wide significant lead SNPs.

**Figure S7B:** Quantile-Quantile plot for conditional analysis for change in best-corrected visual acuity conditioning upon the genome-wide significant lead SNPs.

**Table S2:** Baseline and clinical characteristics between responders and non-responders stratified by different categories.

**Figure S8:** Logistic regression for functional response (Responder:  $\geq 5$  ETDRS letters improvement); **A:** Manhattan plot; **B:** Quantile-Quantile plot

**Figure S9:** Logistic regression for functional response (Responder:  $\geq 15$  ETDRS letters improvement); **A:** Manhattan plot; **B:** Quantile-Quantile plot

**Figure S10:** Logistic regression for functional response (Non-responder:  $\geq 5$  ETDRS loss); **A:** Manhattan plot; **B:** Quantile-Quantile plot

**Figure S11:** Logistic regression for anatomical response (Responder:  $\geq 10\%$  reduction in central macular thickness); **A:** Manhattan plot; **B:** Quantile-Quantile plot

**Table S3:** Expression data of the potential candidate genes for different eye tissues retrieved from the Ocular Tissue Database (OTDB).

| Table S1: Quality control (QC) steps in GenomeStudio (V 2.0) and PLINK (1.9/2.0) for individual array set |                                   |                                   |                                                                                                                                                                                                          |                                              |                                                    |                                                                                                                     |                                                                                                                                                                                                                                   |                                                                                                                                                                                                                                                                                                      |
|-----------------------------------------------------------------------------------------------------------|-----------------------------------|-----------------------------------|----------------------------------------------------------------------------------------------------------------------------------------------------------------------------------------------------------|----------------------------------------------|----------------------------------------------------|---------------------------------------------------------------------------------------------------------------------|-----------------------------------------------------------------------------------------------------------------------------------------------------------------------------------------------------------------------------------|------------------------------------------------------------------------------------------------------------------------------------------------------------------------------------------------------------------------------------------------------------------------------------------------------|
| Array version                                                                                             | Starting numbers                  | Post Genome Studio QC numbers     | Post individual QC (PLINK)                                                                                                                                                                               | Duplicate, non-biallelic, indel SNPs removed | Number of SNPs common to all versions of the array | After merge                                                                                                         | Post merge QC (PLINK)                                                                                                                                                                                                             | Post-imputation QC (PLINK)                                                                                                                                                                                                                                                                           |
| Data-A (GSAM D-24v3-0-EA_A1)                                                                              | 730059 SNPs<br><br>96 individuals | 480728 SNPs<br><br>96 individuals | 458089 SNPs<br><br>95 individuals<br><br><b>QC parameters:</b><br>--geno 0.02 (158 SNPs removed)<br>--mind 0.02 (0 individuals removed)<br>--sex (0 individuals removed)<br>--het (1 individual removed) | 452328 SNPs<br><br>(5761 SNPs removed)       | 377657 SNPs<br><br>95 individuals                  | 339682 SNPs<br><br>226 individuals (3 duplicate individuals and 1 ineligible patient)<br><br>Genotyping rate 99.99% | 281,952 SNPs<br><br>221 individuals, Genotyping rate=99.99%)<br><br><b>QC parameters:</b><br>--geno 0.02 (all pass)<br>--mind 0.02 (all pass)<br>--maf 0.01 (57730 SNPs removed)<br>-cryptic related (pi-hat $\geq 0.1875$ =none) | " info R2<0.8" 8,348,433 SNPs remaining out of 39,127,678<br><br>221 individuals, Genotyping rate=95.30%<br><br><b>Post QC:</b> SNPs=2,581,674<br><br>220 samples Genotyping rate=99.30 %<br><br><b>QC parameters:</b><br>--geno 0.03 (3,122,034 SNPs removed)<br>--mind 0.03 (0 individual removed) |

|                           |                                         |                                                                                        |                                                                                                                                                                                                                                       |                                               |                                         |  |                                                                |                                                                                                                                                              |
|---------------------------|-----------------------------------------|----------------------------------------------------------------------------------------|---------------------------------------------------------------------------------------------------------------------------------------------------------------------------------------------------------------------------------------|-----------------------------------------------|-----------------------------------------|--|----------------------------------------------------------------|--------------------------------------------------------------------------------------------------------------------------------------------------------------|
| Data-B<br>(GSA-24v1-0_C1) | 618540<br>SNPs<br><br>87<br>individuals | 516336<br>SNPs<br><br>87<br>individuals                                                | 503869<br>SNPs<br><br>85<br>individuals<br><br><b>QC<br/>parameters:</b><br>--geno 0.02<br>(1072 SNPs removed)<br>--mind 0.02<br>(0 individuals removed)<br>--sex<br>(1 individual removed)<br>--het (6 SD)<br>(1 individual removed) | 500209<br>SNPs<br><br>(3660<br>SNPs removed)  | 377657<br>SNPs<br><br>85<br>individuals |  | --het (1 individual removed)<br>PCA- 4 ethnic outliers removed | --maf 0.02<br>(2,644,725 SNPs removed)<br>--hwe 1E-06<br>--cryptic relatedness (king-cut off $\geq 0.0884$ , 0 removed)<br>--het (6SD, 1 individual removed) |
| Data-C<br>(GSA-24v3-0-A1) | 654027<br>SNPs<br><br>51<br>individuals | 637311<br>SNPs<br><br>50<br>individuals<br>(1 individual removed due to low call rate) | 636715<br>SNPs<br><br>50<br>individuals<br><br><b>QC<br/>parameters:</b><br>--geno 0.02<br>(596 SNPs removed)                                                                                                                         | 624137<br>SNPs<br><br>(12578<br>SNPs removed) | 377657<br>SNPs<br><br>50<br>individuals |  |                                                                |                                                                                                                                                              |

|  |  |  |                                                                                                                         |  |  |  |  |  |
|--|--|--|-------------------------------------------------------------------------------------------------------------------------|--|--|--|--|--|
|  |  |  | --mind 0.02<br>(0 individual<br>removed)<br>--sex (0<br>individuals<br>removed)<br>-- het (0<br>individuals<br>removed) |  |  |  |  |  |
|--|--|--|-------------------------------------------------------------------------------------------------------------------------|--|--|--|--|--|

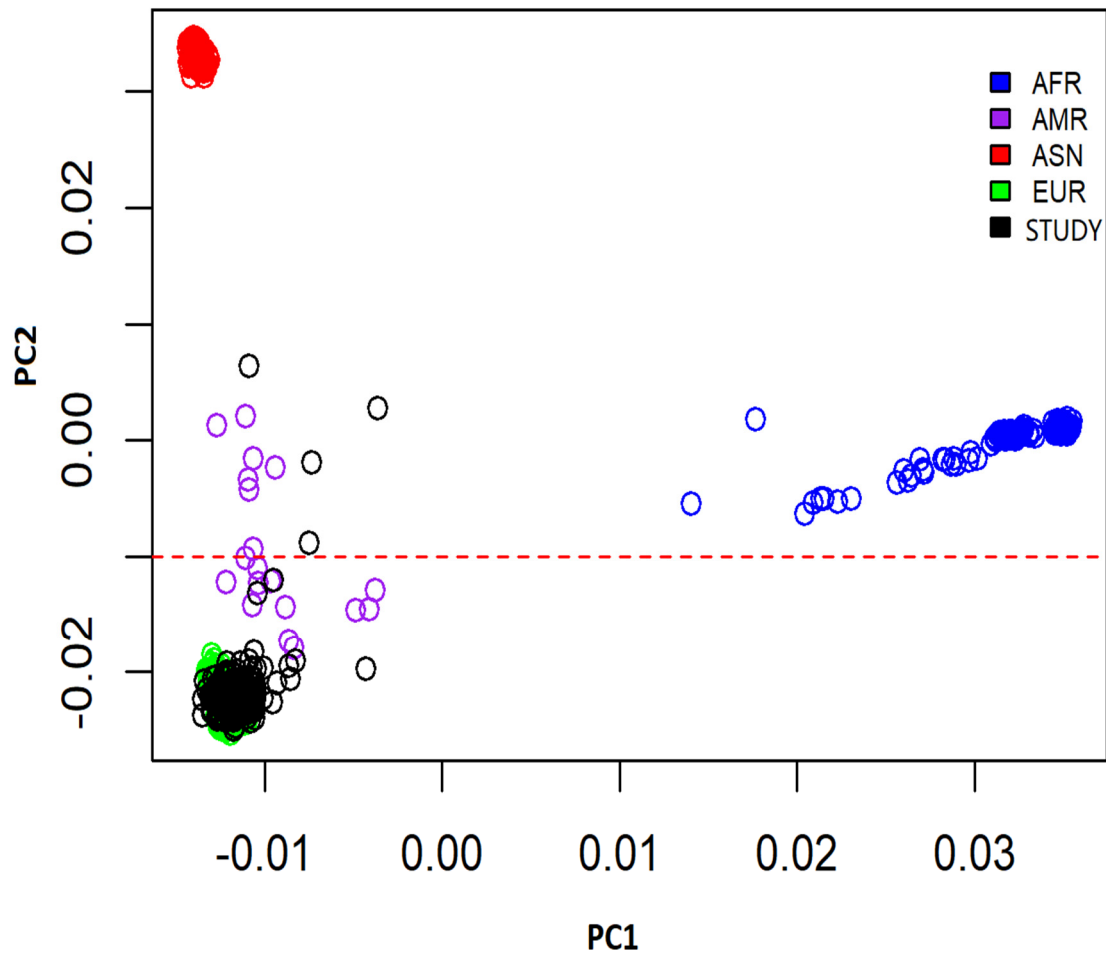

**Figure S1:** Principal component analysis to detect ethnic outliers.

The x-axis represents the first principal component (PC1) and the y-axis is the second principal component (PC2). Each point represents a single individual distinguished by population origin (AFR=African, AMR= Ad Mixed American, ASN=Asian, EUR = European, STUDY=study cohort). Individuals with a second principal component score less than -0.01 (horizontal line) were excluded from analysis.

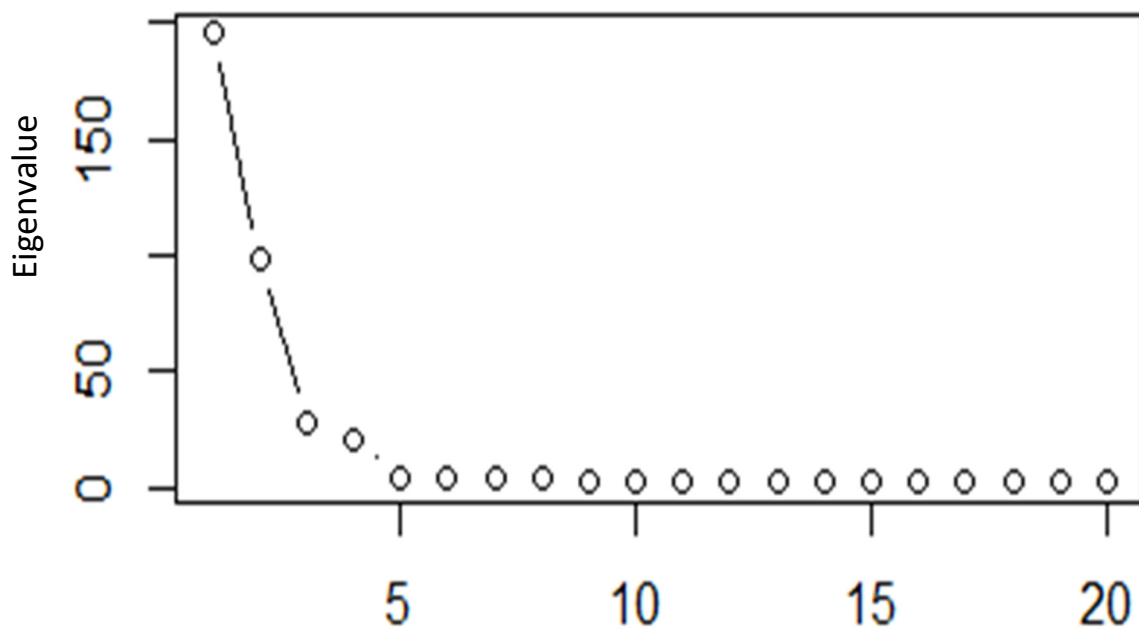

**Figure S2:** Scree plot showing the eigenvalues of the first 20 principal components (PCs). This plot indicates that the first three principal components explain the majority of the variability in this dataset.

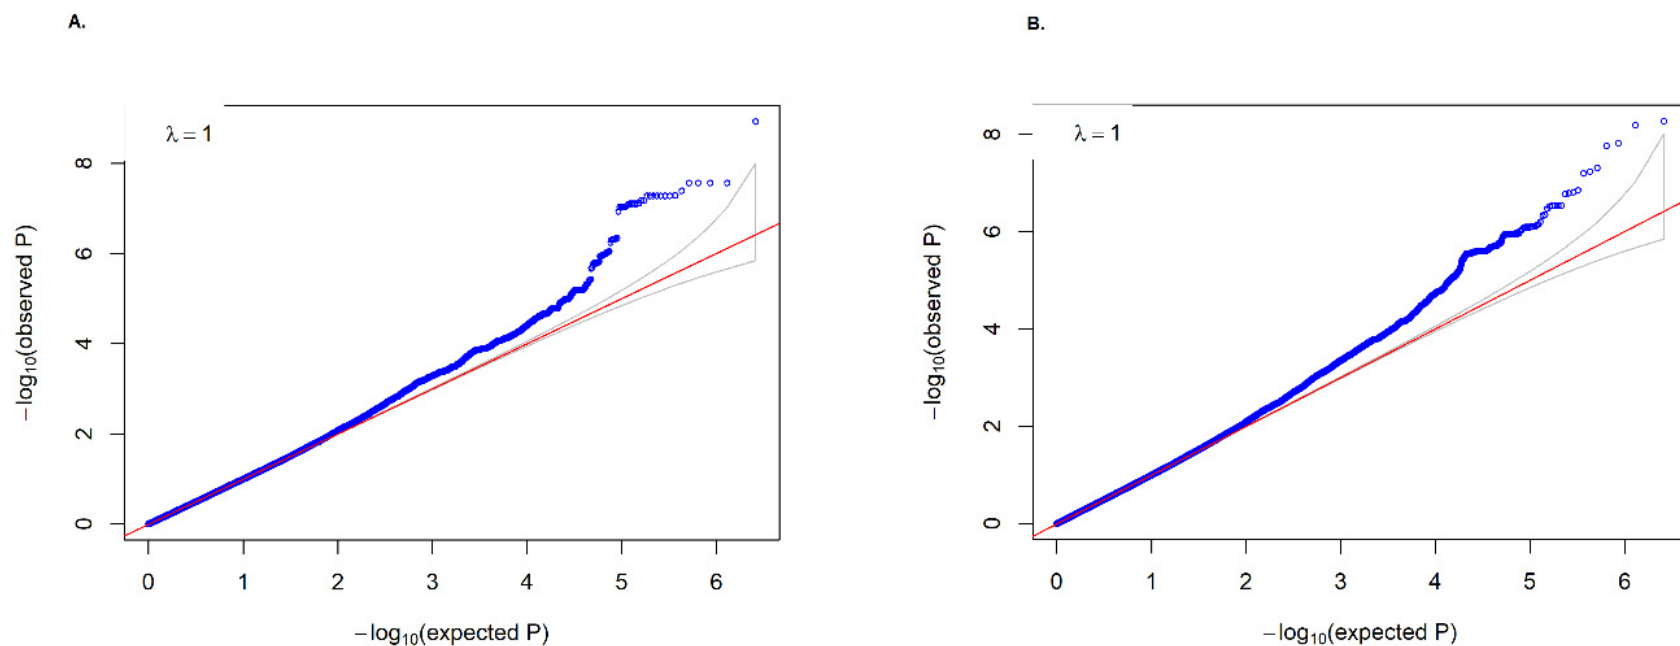

**Figure S3:** Quantile-Quantile plot for association analysis; **A:** Change in central macular thickness; **B:** Change in best-corrected visual acuity. The plots show the expected  $-\log_{10}$  p-values under the null hypothesis on the x-axis, and the observed  $-\log_{10}$  p-values on the y-axis adjusting for covariates ( $\lambda = 1.000$ ). The red lines represent  $x=y$ , and the grey area represents the 95% confidence interval. The  $\lambda$  is a measure of the genomic inflation factor.



A.

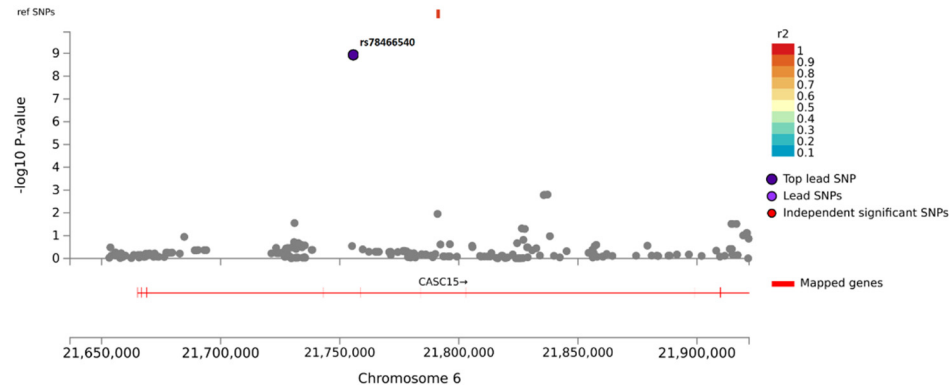

B.

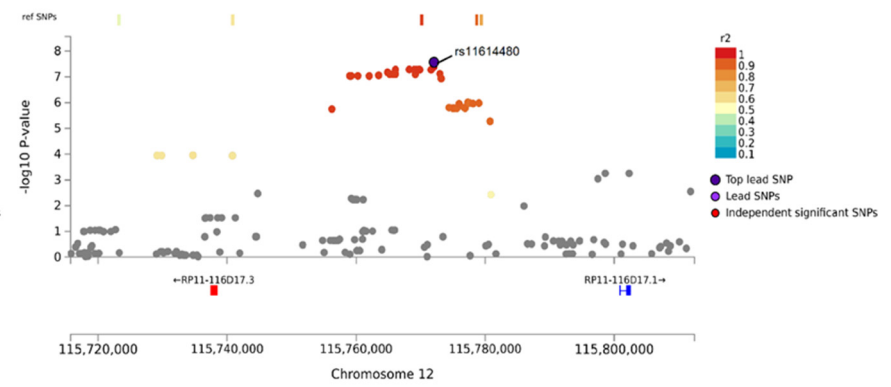

**Figure S4:** Regional plot for genome-wide significant loci for change in central macular thickness. SNPs are color-coded based on  $r^2$  if  $\geq 0.4$ . Non-GWAS-tagged SNPs in the 1000G (Phase3 EUR) reference genome are shown at the top of the plot as rectangles since they do not have a P-value from the GWAS, but they are in linkage disequilibrium with the lead SNP. SNPs below  $r^2 < 0.4$  are colored grey.

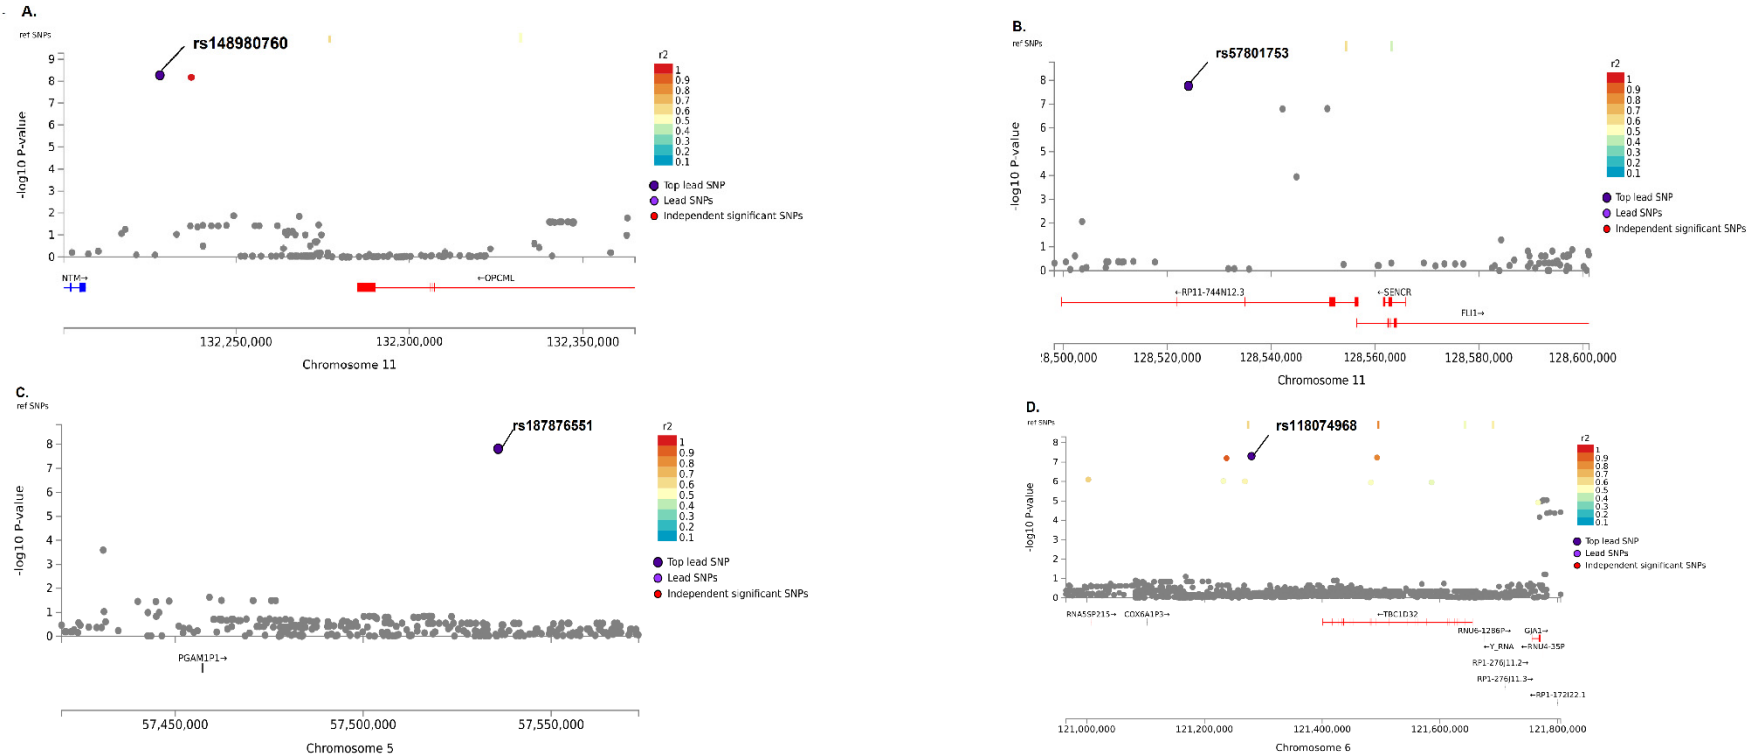

**Figure S5:** Regional plots for genome-wide significant loci for change in best-corrected visual acuity. SNPs are color-coded based on  $r^2$  if  $\geq 0.4$ . Non-GWAS-tagged SNPs in the 1000G (Phase3 EUR) reference genome are shown at the top of the plot as rectangles since they do not have a P-value from the GWAS, but they are in linkage disequilibrium with the lead SNP. SNPs below  $r^2 < 0.4$  are colored grey.

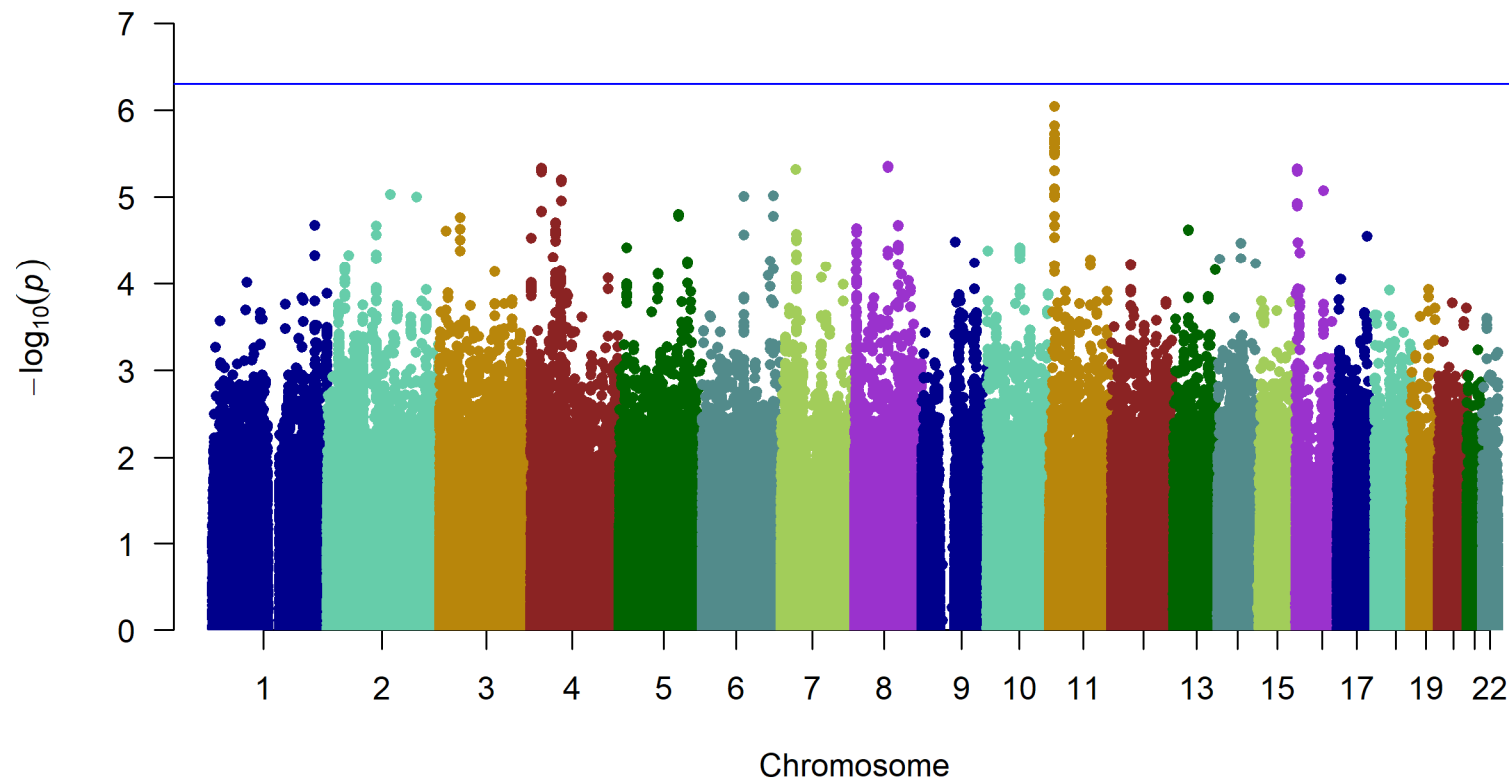

**Figure S6A:** Manhattan plot for conditional analysis for change in central macular thickness conditioning upon the genome-wide significant lead SNPs (rs78466540, rs11614480). The x-axis represents chromosomal position, and the y-axis represents the  $-\log_{10}$  (P-value) of association for each SNP tested. The blue horizontal line corresponds to the threshold for genome-wide suggestive association ( $P \leq 5 \times 10^{-7}$ ).

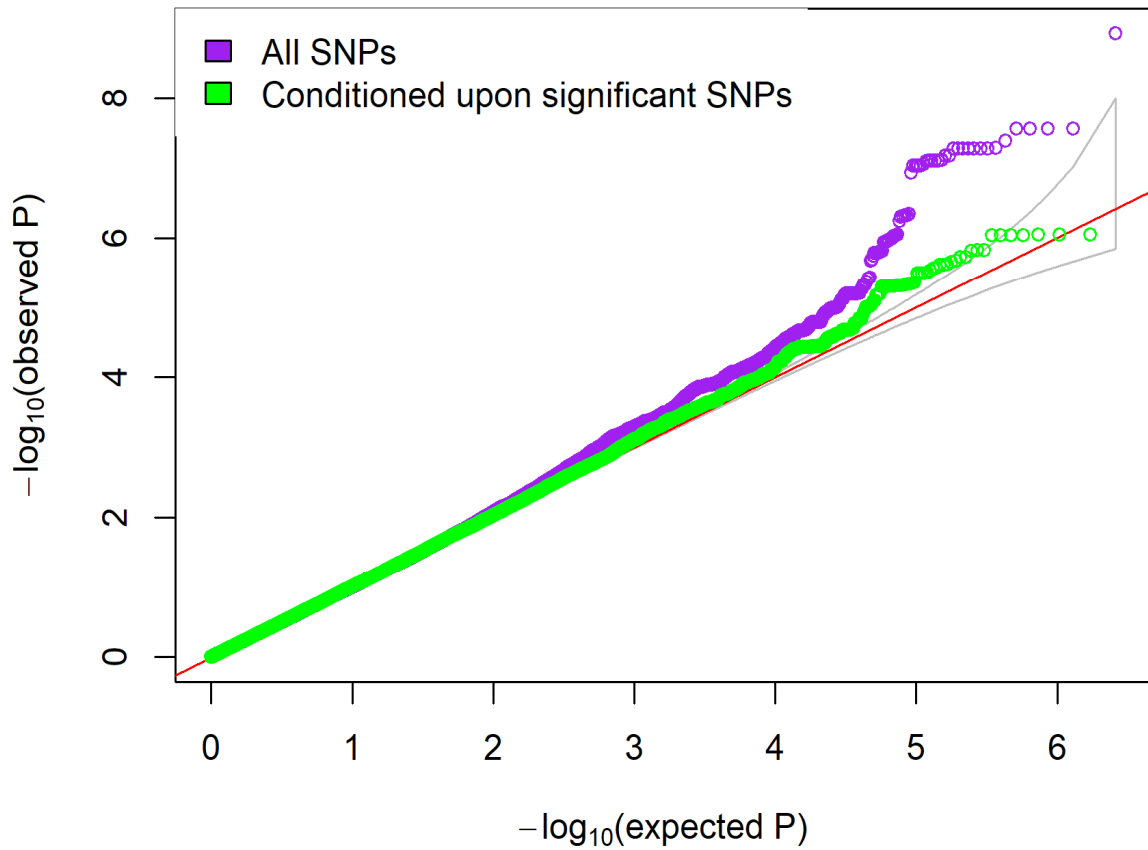

**Figure S6B:** Quantile-Quantile plot for conditional analysis for change in central macular thickness conditioning upon the genome-wide significant lead SNPs (rs78466540, rs11614480). The plot shows the expected  $-\log_{10}$  p-values under the null hypothesis on the x-axis, and the observed  $-\log_{10}$  p-values on the y axis adjusting for covariates Age, HbA1c, duration of diabetic retinopathy, injection type, central macular thickness, and the first three principal components. The red line represents  $x=y$ , and the grey area represents the 95% confidence interval. Purple dots represent plot when all SNPs were included ( $\lambda = 1.000$ ) the green dots represent plot after conditioning by the significant SNPs ( $\lambda = 1.000$ ).

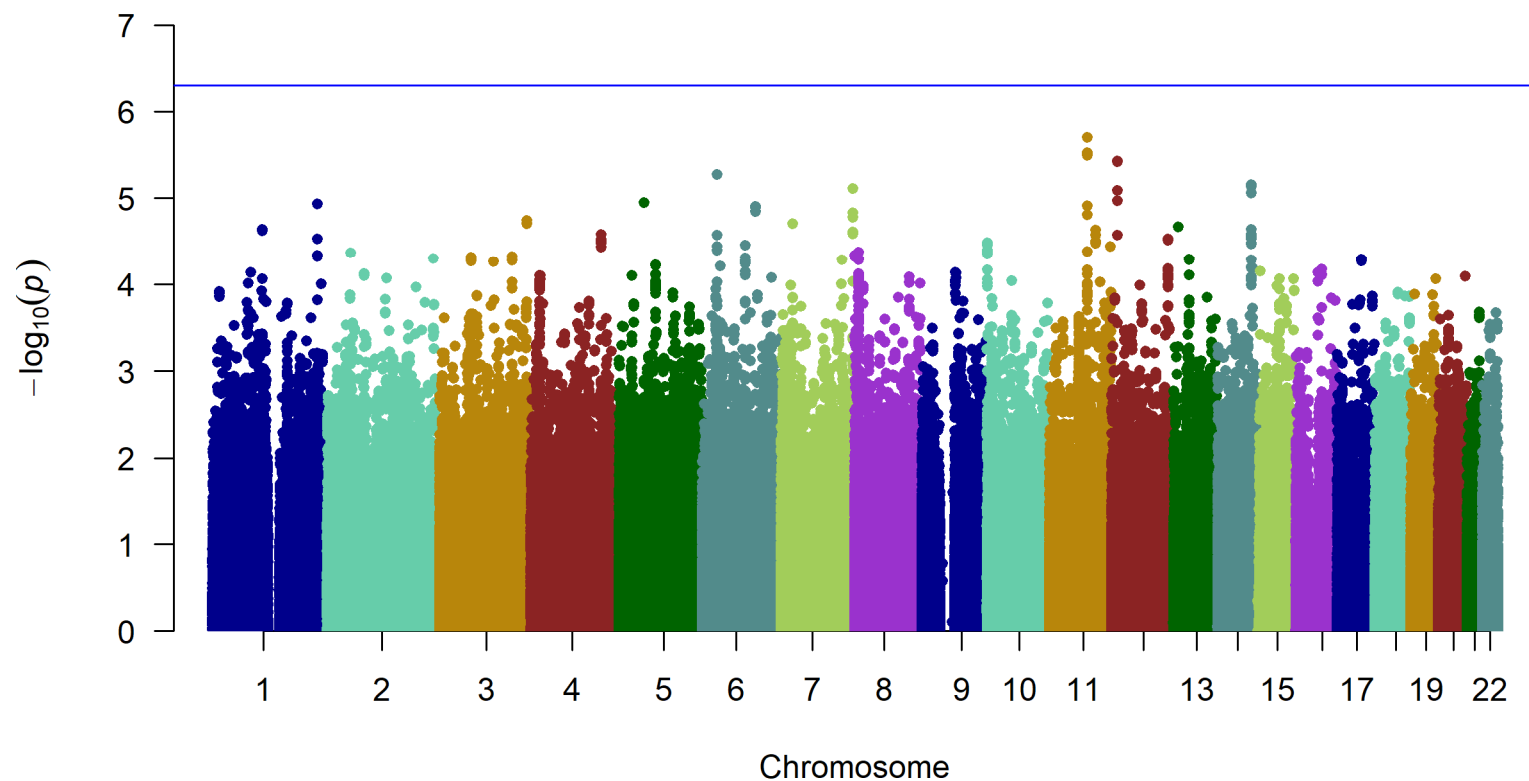

**Figure S7A:** Manhattan plot for conditional analysis for change in best-corrected visual acuity conditioning upon the genome-wide significant lead SNPs (rs148980760, rs187876551, rs57801753, and rs118074968). The x-axis represents chromosomal position, and the y-axis represents the  $-\log_{10}(P\text{-value})$  of association for each SNP tested. The blue horizontal line corresponds to the threshold for genome-wide suggestive association ( $P \leq 5E-07$ ).

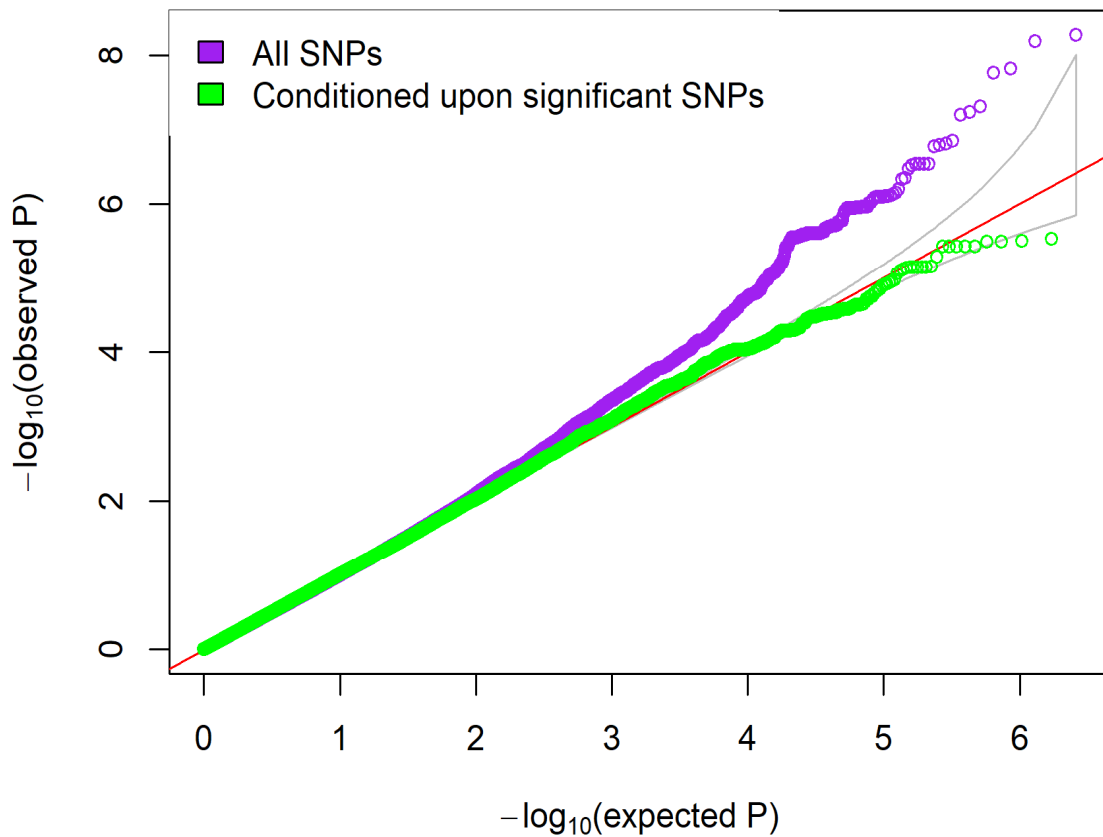

**Figure S7B:** Quantile-Quantile plot for conditional analysis for change in best-corrected visual acuity conditioning upon the genome-wide significant lead SNPs (rs148980760, rs187876551, rs57801753, and rs118074968). The plot shows the expected  $-\log_{10}$  p-values under the null hypothesis on the x-axis, and the observed  $-\log_{10}$  p-values on the y axis adjusting for covariates Age, HbA1c, duration of diabetic retinopathy, injection type, best-corrected visual acuity, and first three principal components. The red line represents  $x=y$ , and the grey area represents the 95% confidence interval. Purple dots represent plot when all SNPs were included ( $\lambda = 1.000$ ) the green dots represent plot after conditioning by the significant SNPs ( $\lambda = 1.000$ ).

**Table S2: Baseline and clinical characteristics between responders and non-responders stratified by different categories**

| <b>≥5 ETDRS letters criteria</b>  | <b>Responders (N=114)</b> | <b>Non-responder (N=106)</b> | <b>P value</b>    |
|-----------------------------------|---------------------------|------------------------------|-------------------|
| <i>Individual related</i>         |                           |                              |                   |
| Baseline BCVA (ETDRS letters)     | 61.25 (14.01)             | 67.48 (14.42)                | <b>0.001</b>      |
| Baseline CMT (microns)            | 383.11 (90.28)            | 377.83 (117.51)              | 0.708             |
| Age (years)                       | 65.73 (12.68)             | 67.02 (11.59)                | 0.433             |
| Male, N (%)                       | 84 (73.7)                 | 67 (63.2)                    | 0.094             |
| BMI (kg/m <sup>2</sup> )          | 33.66 (7.66)              | 33.87 (8.37)                 | 0.841             |
| T2, N (%)                         | 96 (84.2)                 | 85 (80.2)                    | 0.435             |
| DM duration (years)               | 21.79 (10.55)             | 23.75 (9.65)                 | 0.152             |
| HbA1c (g/dl)                      | 8.42 (1.63)               | 8.34 (1.63)                  | 0.737             |
| HTN:Yes, N (%)                    | 99 (86.8)                 | 89 (84.0)                    | 0.545             |
| Nephropathy: Yes, N (%)           | 62 (54.4)                 | 58 (54.7)                    | 0.961             |
| Hyperlipidemia: Yes, N (%)        | 102 (89.5)                | 96 (90.6)                    | 0.787             |
| Smoker: Yes, N (%)                | 58 (50.9)                 | 53(50.0)                     | 0.897             |
| <i>Eye related</i>                |                           |                              |                   |
| Laterality: RE, N (%)             | 62 (54.40)                | 51 (48.10)                   | 0.352             |
| Lens: Phakic, N (%)               | 77(67.50)                 | 71 (67.00)                   | 0.958             |
| DR duration (years)               | 7.49 (3.95)               | 8.68 (4.44)                  | 0.047             |
| DR severity: N (%)                |                           |                              | 0.813             |
| Mild                              | 1 (0.90)                  | 0(0.00)                      |                   |
| Moderate                          | 32(28.10)                 | 35 (33.00)                   |                   |
| Severe                            | 18 (15.80)                | 17 (16.00)                   |                   |
| PDR                               | 39 (34.20)                | 33 (31.10)                   |                   |
| PRP: Yes, N (%)                   | 48 (42.10)                | 42(39.60)                    | 0.708             |
| Injection number                  | 8.05 (2.84)               | 7.99 (3.31)                  | 0.896             |
| Injection type: N (%)             |                           |                              | 0.538             |
| Bevacizumab                       | 61 (53.50)                | 65 (61.30)                   |                   |
| Ranibizumab                       | 20 (17.50)                | 17 (16.00)                   |                   |
| Aflibercept                       | 16 (14.00)                | 9 (8.50)                     |                   |
| Mixed                             | 17 (14.90)                | 15 (14.20)                   |                   |
| <b>≥15 ETDRS letters criteria</b> | <b>Responders (N=31)</b>  | <b>Non-responder (N=189)</b> | <b>P value</b>    |
| <i>Individual related</i>         |                           |                              |                   |
| Baseline BCVA (ETDRS letters)     | 50.23 (15.37)             | 66.56 (13.04)                | <b>&lt; 0.001</b> |
| Baseline CMT (microns)            | 428.29 (111.13)           | 372.74 (101.05)              | <b>0.006</b>      |
| Age (years)                       | 65.90 (11.39)             | 66.42 (12.31)                | 0.826             |
| Male, N (%)                       | 21 (67.7)                 | 130 (68.8)                   | 0.908             |
| BMI (kg/m <sup>2</sup> )          | 36.34 (9.31)              | 33.34 (7.71)                 | 0.052             |

|                                     |                           |                             |                |
|-------------------------------------|---------------------------|-----------------------------|----------------|
| T2, N (%)                           | 28 (98.3)                 | 153 (81.0)                  | 0.205          |
| DM duration (years)                 | 22.39 (12.77)             | 22.79 (9.70)                | 0.837          |
| HbA1c (g/dl)                        | 8.65 (1.51)               | 8.34 (1.64)                 | 0.323          |
| HTN:Yes, N (%)                      | 26 (83.9)                 | 162 (85.7)                  | 0.787          |
| Nephropathy: Yes, N (%)             | 17 (54.8)                 | 103 (54.5)                  | 0.972          |
| Hyperlipidemia: Yes, N (%)          | 29 (93.5)                 | 169 (89.4)                  | 0.477          |
| Smoker: Yes, N (%)                  | 18 (58.1)                 | 93(49.2)                    | 0.361          |
| <i>Eye related</i>                  |                           |                             |                |
| Laterality: RE, N (%)               | 17 (54.80)                | 96 (50.80)                  | 0.676          |
| Lens: Phakic, N (%)                 | 22 (71.00)                | 119 (63.00)                 | 0.457          |
| DR duration (years)                 | 7.49 (3.95)               | 8.68 (4.44)                 | 0.047          |
| DR severity: N (%)                  |                           |                             | 0.286          |
| Mild                                | 2 (6.50)                  | 44(23.30)                   |                |
| Moderate                            | 11 (35.50)                | 56 (29.60)                  |                |
| Severe                              | 7 (22.60)                 | 28 (14.80)                  |                |
| PDR                                 | 11 (35.50)                | 61 (32.30)                  |                |
| PRP: Yes, N (%)                     | 12 (38.70)                | 78 (41.30)                  | 0.788          |
| Injection number                    | 8.52 (3.15)               | 7.94 (3.06)                 | 0.331          |
| Injection type: N (%)               |                           |                             | 0.440          |
| Bevacizumab                         | 18 (58.10)                | 108 (57.10)                 |                |
| Ranibizumab                         | 4 (12.90)                 | 33 (17.50)                  |                |
| Aflibercept                         | 2 (6.5)                   | 23 (12.20)                  |                |
| Mixed                               | 7 (22.60)                 | 25 (13.20)                  |                |
| <b>Non-Responders≥ 5 ETDRS loss</b> | <b>Responders (N=178)</b> | <b>Non-responder (N=42)</b> | <b>P value</b> |
| <i>Individual related</i>           |                           |                             |                |
| Baseline BCVA (ETDRS letters)       | 63.30 (14.82)             | 68.29 (12.52)               | <b>0.045</b>   |
| Baseline CMT (microns)              | 385.65 (104.95)           | 359.05 (98.62)              | 0.137          |
| Age (years)                         | 66.06 (12.40)             | 67.57 (11.15)               | 0.471          |
| Male, N (%)                         | 125 (70.20)               | 26 (61.90)                  | 0.296          |
| BMI (kg/m <sup>2</sup> )            | 33.96 (8.29)              | 32.90 (6.64)                | 0.442          |
| T2, N (%)                           | 149 (83.70)               | 32 (76.20)                  | 0.251          |
| DM duration (years)                 | 22.49 (10.16)             | 23.76 (10.21)               | 0.468          |
| HbA1c (g/dl)                        | 8.41 (1.65)               | 8.24 (1.54)                 | 0.553          |
| HTN:Yes, N (%)                      | 154 (86.50)               | 34 (81.00)                  | 0.358          |
| Nephropathy: Yes, N (%)             | 100 (56.2)                | 20 (47.6)                   | 0.316          |
| Hyperlipidemia: Yes, N (%)          | 160 (89.90)               | 38 (90.50)                  | 0.909          |
| Smoker: Yes, N (%)                  | 91 (51.1)                 | 20(47.6)                    | 0.683          |
| <i>Eye related</i>                  |                           |                             |                |
| Laterality: RE, N (%)               | 90 (50.60)                | 23 (54.80)                  | 0.624          |
| Lens: Phakic, N (%)                 | 116 (65.20)               | 25 (59.50)                  | 0.698          |
| DR duration (years)                 | 7.65 (4.31)               | 9.33 (4.04)                 | <b>0.022</b>   |
| DR severity: N (%)                  |                           |                             | 0.355          |



|                                    |                           |                             |                  |
|------------------------------------|---------------------------|-----------------------------|------------------|
| Mild                               | 41 (23.10)                | 5 (11.90)                   |                  |
| Moderate                           | 50 (28.10)                | 17 (40.50)                  |                  |
| Severe                             | 27 (15.20)                | 8 (19.00)                   |                  |
| PDR                                | 60 (33.70)                | 12 (28.60)                  |                  |
| PRP: Yes, N (%)                    | 73 (41.00)                | 17 (40.50)                  | 0.949            |
| Injection number                   | 8.13 (2.96)               | 7.57 (3.47)                 | 0.295            |
| Injection type: N (%)              |                           |                             | 0.272            |
| Bevacizumab                        | 99 (55.60)                | 27 (64.30)                  |                  |
| Ranibizumab                        | 32 (18.00)                | 5 (11.90)                   |                  |
| Aflibercept                        | 23 (12.90)                | 2 (4.80)                    |                  |
| Mixed                              | 24 (13.50)                | 8 (19.00)                   |                  |
| <b>≥10% CMT reduction criteria</b> | <b>Responders (N=125)</b> | <b>Non-responder (N=95)</b> |                  |
| <i>Individual related</i>          |                           |                             |                  |
| Baseline BCVA (ETDRS letters)      | 62.89 (16.32)             | 66.05 (11.58)               | 0.110            |
| Baseline CMT (microns)             | 421.28 (113.08)           | 327.00 (57.15)              | <b>&lt;0.001</b> |
| Age (years)                        | 67.05 (12.43)             | 65.43 (11.79)               | 0.330            |
| Male, N (%)                        | 21 (67.70)                | 130 (68.80)                 | 0.598            |
| BMI (kg/m <sup>2</sup> )           | 32.91 (7.98)              | 34.88 (7.92)                | 0.070            |
| T2, N (%)                          | 105 (84.00)               | 76 (80.00)                  | 0.442            |
| DM duration (years)                | 22.06 (10.10)             | 23.62 (10.22)               | 0.261            |
| HbA1c (g/dl)                       | 8.11 (1.60)               | 8.74 (1.60)                 | <b>0.004</b>     |
| HTN:Yes, N (%)                     | 110 (88.00)               | 78 (82.10)                  | 0.219            |
| Nephropathy: Yes, N (%)            | 64 (51.20)                | 56 (58.90)                  | 0.253            |
| Hyperlipidemia: Yes, N (%)         | 114 (91.20)               | 84 (88.40)                  | 0.496            |
| Smoker: Yes, N (%)                 | 60 (48.00)                | 51 (53.70)                  | 0.404            |
| <i>Eye related</i>                 |                           |                             |                  |
| Laterality: RE, N (%)              | 65 (52.00)                | 48 (50.50)                  | 0.829            |
| Lens: Phakic, N (%)                | 84 (67.20)                | 57 (60.00)                  | 0.059            |
| DR duration (years)                | 8.33 (4.31)               | 7.49 (4.28)                 | 0.156            |
| DR severity: N (%)                 |                           |                             |                  |
| Mild                               | 32 (25.60)                | 14(14.80)                   | 0.165            |
| Moderate                           | 37 (29.60)                | 30 (31.60)                  |                  |
| Severe                             | 20 (16.00)                | 15 (15.80)                  |                  |
| PDR                                | 36 (28.80)                | 36 (37.90)                  |                  |
| PRP: Yes, N (%)                    | 47 (37.60)                | 43 (45.30)                  |                  |
| Injection number                   | 8.06 (2.98)               | 7.97 (3.20)                 | 0.834            |
| Injection type: N (%)              |                           |                             |                  |
| Bevacizumab                        | 68 (54.40)                | 58 (61.10)                  |                  |
| Ranibizumab                        | 25 (20.00)                | 12 (12.60)                  |                  |
| Aflibercept                        | 17 (13.60)                | 8 (8.40)                    |                  |
| Mixed                              | 15 (12.00)                | 17 (17.90)                  |                  |

Abbreviations:BCVA=best corrected visual acuity; BMI=body mass index; CMT=central macular thickness; DM=diabetes mellitus; DR=diabetic retinopathy; ETDRS=early treatment diabetic retinopathy study;

---

HTN=hypertension; PDR=proliferative diabetic retinopathy; PRP=pan-retinal photocoagulation; RE=right eye

Data are presented as mean (SD). Chi-square test for categorical. Significant p-values are bolded

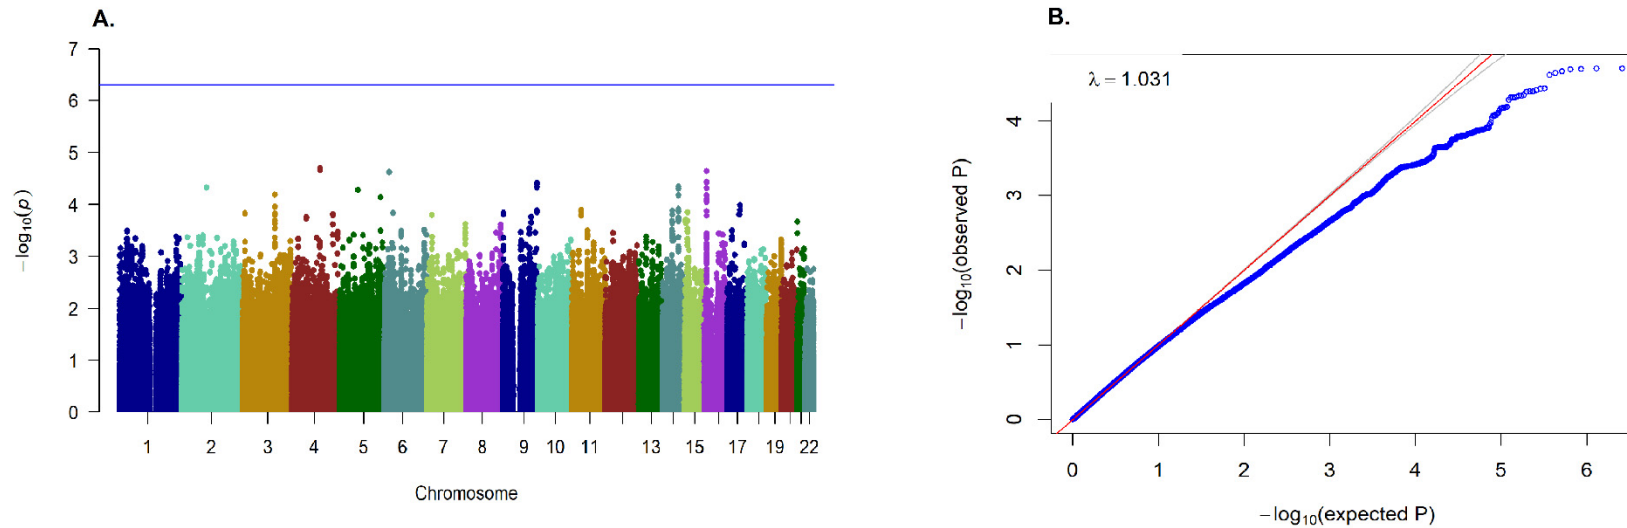

**Figure S8:** Logistic regression for functional response (Responder:  $\geq 5$  ETDRS letters improvement).

**A:** Manhattan plot for association analysis adjusting for baseline best-corrected visual acuity and the first three principal components. The x-axis represents chromosomal position, and the y-axis represents the  $-\log_{10}$  (P-value) of association for each SNP tested. The blue horizontal line corresponds to genome-wide suggestive threshold ( $P \leq 5 \times 10^{-7}$ ).

**B:** Quantile-quantile plot shows the expected  $-\log_{10}$  p-values under the null hypothesis on the x-axis, and the observed  $-\log_{10}$  p-values on the y-axis adjusting for baseline best-corrected visual acuity and the first three principal components. The red line represents  $x=y$ , and the grey area represents the 95% confidence interval. The  $\lambda$  is a measure of the genomic inflation factor.

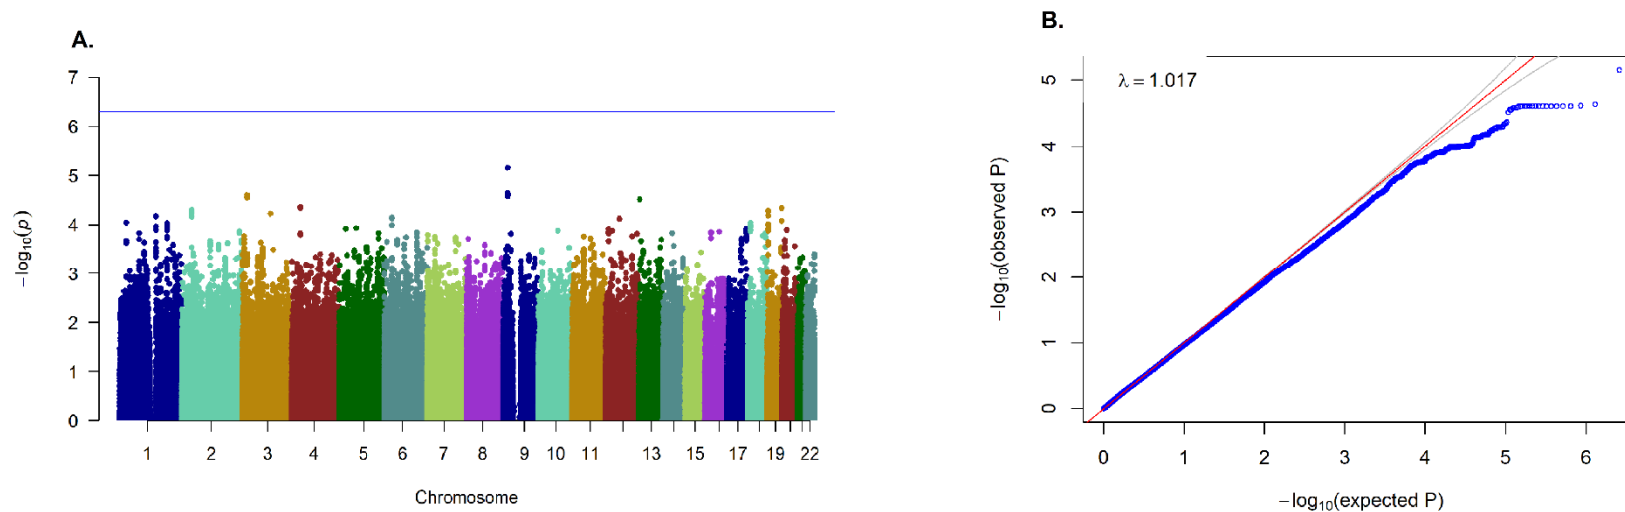

**Figure S9:** Logistic regression for functional response (Responder:  $\geq 15$  ETDRS letters improvement)

**A:** Manhattan plot for association analysis adjusting for baseline best-corrected visual acuity, baseline central macular thickness, and the first three principal components. The x-axis represents chromosomal position, and the y-axis represents the  $-\log_{10}$  (P-value) of association for each SNP tested. The blue horizontal line corresponds to genome-wide suggestive threshold ( $P \leq 5E-07$ ).

**C:** Quantile-quantile plot shows the expected  $-\log_{10}$  p-values under the null hypothesis on the x-axis, and the observed  $-\log_{10}$  p-values on the y-axis adjusting for baseline best-corrected visual acuity, baseline central macular thickness, and the first three principal components. The red line represents  $x=y$ , and the grey area represents the 95% confidence interval. The  $\lambda$  is a measure of the genomic inflation factor.

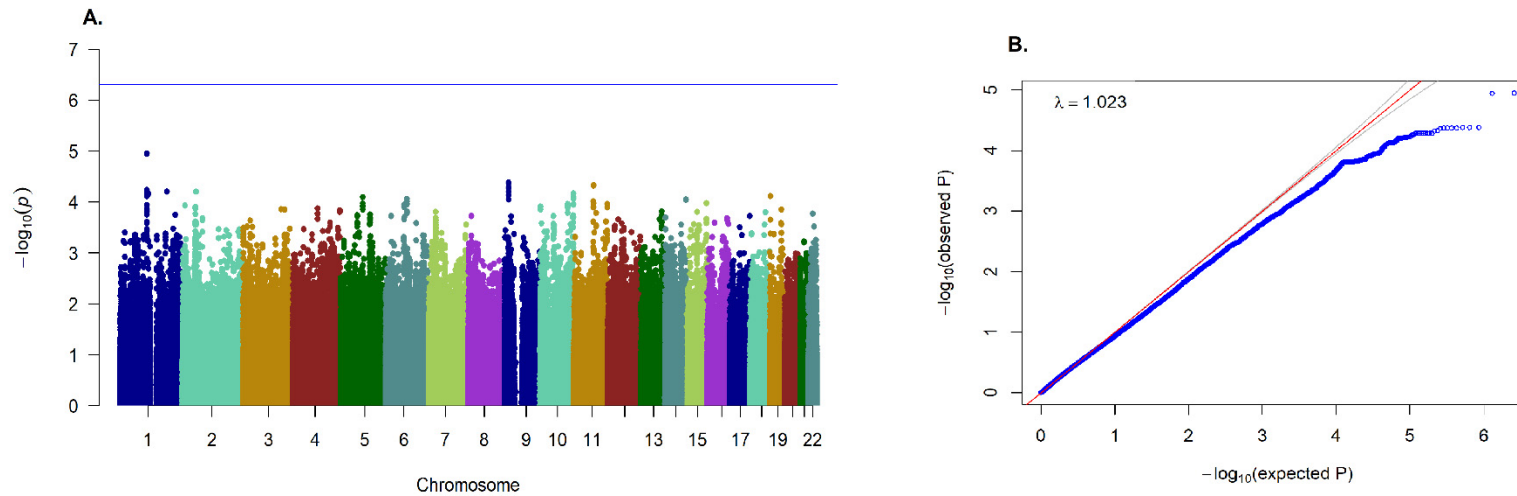

**Figure S10:** Logistic regression for functional response (Non-Responder:  $\geq 5$  ETDRS loss);

**A:** Manhattan plot of association analysis adjusting for baseline best-corrected visual acuity, duration of diabetic retinopathy, and the first three principal components. The x-axis represents chromosomal position, and the y-axis represents the  $-\log_{10}(P\text{-value})$  of association for each SNP tested. The blue horizontal line corresponds to genome-wide suggestive threshold ( $P \leq 5 \times 10^{-7}$ ).

**B:** Quantile-quantile plot shows the expected  $-\log_{10} p$ -values under the null hypothesis on the x-axis, and the observed  $-\log_{10} p$ -values on the y-axis adjusting for baseline best-corrected visual acuity, duration of diabetic retinopathy, and the first three principal components. The red line represents  $x=y$ , and the grey area represents the 95% confidence interval. The  $\lambda$  is a measure of the genomic inflation factor.

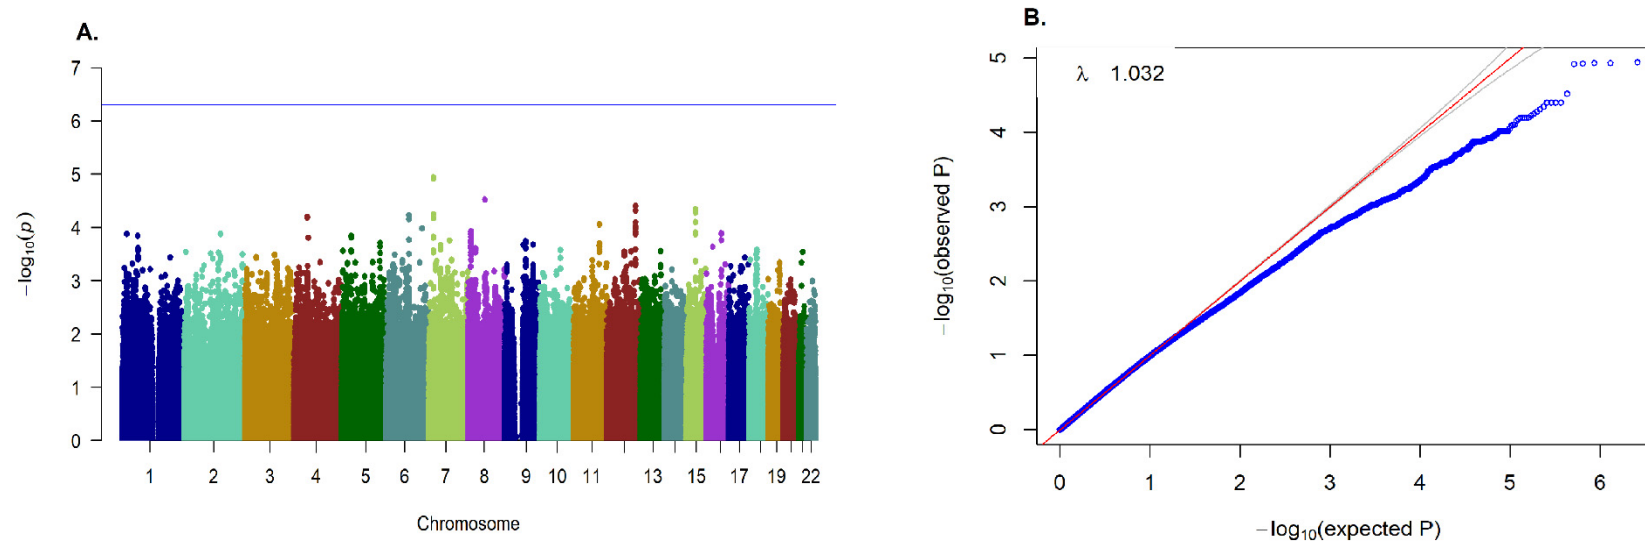

**Figure S11:** Logistic regression for anatomical response (Responder:  $\geq 10\%$  reduction in central macular thickness)

**A:** Manhattan plot of association analysis adjusting for baseline central macular thickness, HbA1c, and the first three principal components. The x-axis represents chromosomal position, and the y-axis represents the  $-\log_{10}$  (P-value) of association for each SNP tested. The blue horizontal line corresponds to genome-wide suggestive threshold ( $P \leq 5 \times 10^{-7}$ ).

**B:** Quantile-quantile plot shows the expected  $-\log_{10}$  p-values under the null hypothesis on the x-axis, and the observed  $-\log_{10}$  p-values on the y-axis adjusting for baseline central macular thickness, HbA1c, and the first three principal components. The red line represents  $x=y$ , and the grey area represents the 95% confidence interval. The  $\lambda$  is a measure of the genomic inflation factor.

**Table S3: Expression data (PLIER score) of the potential candidate genes for different eye tissues retrieved from the Ocular Tissue Database (OTDB).**

|                             | Genes                | Choroid<br>retinal<br>pigment<br>epithelium<br>(RPE) | Ciliary<br>body | Cornea  | Iris    | Lens    | Optic<br>Nerve | Optic<br>Nerve<br>Head | Retina  | Sclera  | Trabecular<br>Meshwork |
|-----------------------------|----------------------|------------------------------------------------------|-----------------|---------|---------|---------|----------------|------------------------|---------|---------|------------------------|
| <b>Significant<br/>loci</b> | <i>CASC15</i>        | -                                                    | -               | -       | -       | -       | -              | -                      | -       | -       | -                      |
|                             | <i>RP11-116D17.1</i> | -                                                    | -               | -       | -       | -       | -              | -                      | -       | -       | -                      |
|                             | <i>NTM</i>           | 36.1744                                              | 25.4854         | 21.2339 | 28.9124 | 33.5313 | 59.0734        | 44.1297                | 73.7647 | 36.1583 | 32.2057                |
|                             | <i>PGAM1P1</i>       | -                                                    | -               | -       | -       | -       | -              | -                      | -       | -       | -                      |
|                             | <i>RP11-744N12.3</i> | -                                                    | -               | -       | -       | -       | -              | -                      | -       | -       | -                      |
|                             | <i>TBC1D32</i>       | -                                                    | -               | -       | -       | -       | -              | -                      | -       | -       | -                      |
| <b>Suggestive<br/>loci</b>  | <i>EPHA5</i>         | 18.9253                                              | 23.8659         | 20.1597 | 24.8548 | 23.7192 | 24.4528        | 23.3787                | 22.264  | 23.8881 | 13.8842                |
|                             | <i>DNASE1</i>        | 40.2426                                              | 32.7204         | 35.0726 | 39.5583 | 32.8458 | 30.6663        | 29.7455                | 31.4745 | 30.5837 | 37.8598                |
|                             | <i>AP003733.1</i>    | -                                                    | -               | -       | -       | -       | -              | -                      | -       | -       | -                      |
|                             | <i>RP11-179A16.1</i> | -                                                    | -               | -       | -       | -       | -              | -                      | -       | -       | -                      |
|                             | <i>AC069243.1</i>    | -                                                    | -               | -       | -       | -       | -              | -                      | -       | -       | -                      |
|                             | <i>COL4A1</i>        | 50.7142                                              | 42.6072         | 24.592  | 39.6132 | 54.5327 | 26.2596        | 29.0696                | 30.377  | 30.395  | 46.7098                |

|                                                                |                      |         |         |         |         |         |         |         |         |         |         |
|----------------------------------------------------------------|----------------------|---------|---------|---------|---------|---------|---------|---------|---------|---------|---------|
|                                                                | <i>JPH1</i>          | 20.5319 | 17.1471 | 29.4043 | 15.0664 | 27.3079 | 13.2068 | 17.8659 | 14.6479 | 19.5787 | 19.3243 |
|                                                                | <i>RP6-91H8.2</i>    | -       | -       | -       | -       | -       | -       | -       | -       | -       | -       |
| <b>eQTL</b>                                                    | <i>RP11-116D17.3</i> | -       | -       | -       | -       | -       | -       | -       | -       | -       | -       |
|                                                                | <i>GJA1</i>          | 887.985 | 890.373 | 1378.98 | 1713.06 | 553.158 | 1193.29 | 1404.32 | 61.0931 | 379.516 | 566.688 |
| Note: '-' indicates that the gene was not present in the OTDB. |                      |         |         |         |         |         |         |         |         |         |         |
